# Supplementary material
Source: MDPI journal article supplement (https://www.mdpi.com/2073-445X/12/2/406)
Supplement: s1 [file s1]

## Article

### The Configuration of Romanian Carpathians Landscape Controls the Volume Diversity of *Picea Abies* (L.) Stands

Vlad-Emil Crișan <sup>1,\*</sup>, Lucian Dincă <sup>1</sup>, Cosmin Bragă <sup>1</sup>, Gabriel Murariu <sup>2,\*</sup>, Eliza Tupu <sup>3</sup>, George Danut Mocanu <sup>4</sup> and Romana Drasovean <sup>2</sup>

<sup>1</sup> “Marin Dracea” National Research and Development Institute in Forestry, 13 Cloșca Street, 500040 Brașov, Romania

<sup>2</sup> Chemistry, Physics, and Environment Department, Faculty of Sciences and Environment, “Dunărea de Jos” University of Galați, No. 47 Street Domnească, 800008 Galați, Romania

<sup>3</sup> Natural Sciences Museum Complex “Răsvan Angheluță” Galați, No. 11 Street Regimentul 11, 800340 Galați, Romania

<sup>4</sup> Faculty of Physical Education and Sport, “Dunărea de Jos” University of Galați, No. 47 Street Domnească, 800008 Galați, Romania

\* Correspondence: vlad\_crsn@yahoo.com (V.-E.C.); gabriel.murariu@ugal.ro (G.M.)

## Section C - Southern Carpathians - north south comparison database

Table SC.1. Descriptive Statistics Southern Carpathians North-South database Median values – Northern area

| Variable - Altitude | Valid N | Mean     | Minimum  | Maximum  | Std. Dev. | Standard Error |
|---------------------|---------|----------|----------|----------|-----------|----------------|
| North 700 m         | 8       | 73.1250  | 48.0000  | 106.0000 | 20.27974  | 7.16997        |
| North 800 m         | 6       | 76.5000  | 46.0000  | 114.0000 | 23.45847  | 9.57688        |
| North 900 m         | 2       | 120.0000 | 93.0000  | 147.0000 | 38.18377  | 27.00000       |
| North 1000 m        | 7       | 90.5714  | 55.0000  | 139.0000 | 30.32522  | 11.46186       |
| North 1100 m        | 12      | 99.5833  | 57.0000  | 167.0000 | 39.61051  | 11.43457       |
| North 1200 m        | 12      | 124.8333 | 68.0000  | 191.0000 | 37.76201  | 10.90095       |
| North 1300 m        | 12      | 155.5833 | 96.0000  | 231.0000 | 38.86447  | 11.21921       |
| North 1400 m        | 12      | 186.6667 | 128.0000 | 258.0000 | 48.77096  | 14.07896       |
| North 1500 m        | 12      | 207.9167 | 121.0000 | 288.0000 | 50.66191  | 14.62483       |
| North 1600 m        | 11      | 180.8182 | 111.0000 | 245.0000 | 44.93510  | 13.54844       |
| North 1700 m        | 10      | 154.0000 | 58.0000  | 227.0000 | 51.79876  | 16.38020       |

Table SC.2. Descriptive Statistics Southern Carpathians North-South database Median values – Southern area

| Variable - Altitude | Valid N | Mean     | Minimum  | Maximum  | Std. Dev. | Standard Error |
|---------------------|---------|----------|----------|----------|-----------|----------------|
| South 700           | 7       | 80.1429  | 37.0000  | 143.0000 | 35.11139  | 13.27086       |
| South 800           | 7       | 89.1429  | 46.0000  | 118.0000 | 25.21526  | 9.53047        |
| South 900           | 9       | 86.4444  | 59.0000  | 143.0000 | 27.33181  | 9.11060        |
| South 1000          | 9       | 99.5556  | 83.0000  | 134.0000 | 18.58838  | 6.19613        |
| South 1100          | 12      | 102.1667 | 62.0000  | 219.0000 | 38.32833  | 11.06443       |
| South 1200          | 12      | 112.3333 | 64.0000  | 190.0000 | 29.68113  | 8.56821        |
| South 1300          | 12      | 169.5833 | 87.0000  | 242.0000 | 49.28481  | 14.22730       |
| South 1400          | 12      | 205.0833 | 28.0000  | 305.0000 | 67.52704  | 19.49338       |
| South 1500          | 12      | 231.0833 | 126.0000 | 297.0000 | 58.71574  | 16.94977       |
| South 1600          | 12      | 255.5833 | 129.0000 | 351.0000 | 62.77153  | 18.12058       |
| South 1700          | 12      | 184.3333 | 92.0000  | 307.0000 | 65.58732  | 18.93343       |

### Descriptive Statistics

| Variable                       | Valid N | Mean     | Minimum  | Maximum  | Std. Dev. | Std. Error |
|--------------------------------|---------|----------|----------|----------|-----------|------------|
| North Volume (m <sup>3</sup> ) | 104     | 162.7500 | 65.00000 | 264.0000 | 51.41753  | 5.041903   |
| South Volume (m <sup>3</sup> ) | 116     | 173.1379 | 91.00000 | 297.0000 | 61.78503  | 5.736596   |

Correlations (00 Baze\_Date\_Complet\_T3\_T4\_T10-t11-complet.sta) Marked correlations are significant at  $p < .05000$  N=101 (Casewise deletion of missing data)

| Variable             | T3_North Volume (m3) | T3_South Volume (m3) |
|----------------------|----------------------|----------------------|
| T3_North Volume (m3) | 1.0000               | .7616                |
|                      | p= ---               | p=0.00               |
| T3_South Volume (m3) | .7616                | 1.0000               |
|                      | p=0.00               | p= ---               |

Table SC.3. T-test for Independent Samples (Southern Carpathians North-South database) Note: Variables are median values were treated as independent samples

| Group 1 vs. Group 2       | Mean Group 1 | Mean Group 2 | t-value  | df | p        | t separ. var.est. | df       | p 2-sided | Std.Dev. Group 1 | Std.Dev. Group 2 |
|---------------------------|--------------|--------------|----------|----|----------|-------------------|----------|-----------|------------------|------------------|
| North 700 vs. South 700   | 73.1250      | 80.1429      | -0.48230 | 13 | 0.637611 | -0.46525          | 9.33247  | 0.652415  | 20.27974         | 35.11139         |
| North 800 vs. South 700   | 76.5000      | 80.1429      | -0.21557 | 11 | 0.833266 | -0.22259          | 10.46932 | 0.828135  | 23.45847         | 35.11139         |
| North 900 vs. South 900   | 120.0000     | 86.4444      | 1.49351  | 9  | 0.169509 | 1.17757           | 1.23867  | 0.417493  | 38.18377         | 27.33181         |
| North 1000 vs. South 1000 | 90.5714      | 99.5556      | -0.73297 | 14 | 0.475673 | -0.68953          | 9.41610  | 0.507128  | 30.32522         | 18.58838         |

|                              |          |          |          |    |          |          |          |          |          |          |
|------------------------------|----------|----------|----------|----|----------|----------|----------|----------|----------|----------|
| North 1100 vs.<br>South 1100 | 99.5833  | 102.1667 | -0.16236 | 22 | 0.872506 | -0.16236 | 21.97622 | 0.872508 | 39.61051 | 38.32833 |
| North 1200 vs.<br>South 1200 | 124.8333 | 112.3333 | 0.90153  | 22 | 0.377068 | 0.90153  | 20.83706 | 0.377607 | 37.76201 | 29.68113 |
| North 1300 vs.<br>South 1300 | 155.5833 | 169.5833 | -0.77268 | 22 | 0.447932 | -0.77268 | 20.86561 | 0.448375 | 38.86447 | 49.28481 |
| North 1400 vs.<br>South 1400 | 186.6667 | 205.0833 | -0.76589 | 22 | 0.451879 | -0.76589 | 20.02126 | 0.452675 | 48.77096 | 67.52704 |
| North 1500 vs.<br>South 1500 | 207.9167 | 231.0833 | -1.03482 | 22 | 0.311993 | -1.03482 | 21.53792 | 0.312231 | 50.66191 | 58.71574 |
| North 1600 vs.<br>South 1600 | 180.8182 | 255.5833 | -3.25632 | 21 | 0.003775 | -3.30446 | 19.89655 | 0.003558 | 44.93510 | 62.77153 |
| North 1600 vs.<br>South 1700 | 180.8182 | 184.3333 | -0.14852 | 21 | 0.883348 | -0.15098 | 19.51961 | 0.881538 | 44.93510 | 65.58732 |
| North 1700 vs.<br>South 1700 | 154.0000 | 184.3333 | -1.18512 | 20 | 0.249861 | -1.21160 | 19.96123 | 0.239812 | 51.79876 | 65.58732 |

Table SC.4. T-test for Independent Samples (Southern Carpathians North-South database) Note: Variables are average values were treated as independent samples

| Group 1 vs. Group 2          | Mean<br>Group 1 | Mean<br>Group 2 | t-value  | df | p        | t separ.<br>var.est. | df       | p<br>2-sided | Std. Dev.<br>Group 1 | Std. Dev.<br>Group 2 |
|------------------------------|-----------------|-----------------|----------|----|----------|----------------------|----------|--------------|----------------------|----------------------|
| North 700 vs.<br>South 700   | 101.7500        | 129.2857        | -1.75755 | 13 | 0.102332 | -1.76481             | 12.90367 | 0.101235     | 31.06100             | 29.32413             |
| North 800 vs.<br>South 800   | 103.1667        | 124.5714        | -1.48732 | 11 | 0.165024 | -1.50966             | 10.99855 | 0.159311     | 23.26729             | 27.84994             |
| North 900 vs.<br>South 900   | 183.5000        | 114.6667        | 4.66783  | 9  | 0.001172 | 10.07617             | 8.65339  | 0.000005     | 2.12132              | 19.99375             |
| North 1000 vs.<br>South 1000 | 109.8571        | 113.2222        | -0.33805 | 14 | 0.740343 | -0.33815             | 13.05965 | 0.740623     | 19.72670             | 19.77232             |
| North 1100 vs.<br>South 1100 | 122.5833        | 122.7500        | -0.01397 | 22 | 0.988981 | -0.01397             | 20.45292 | 0.988991     | 33.00264             | 24.88565             |
| North 1200 vs.<br>South 1200 | 157.7500        | 138.6667        | 1.63280  | 22 | 0.116744 | 1.63280              | 21.15050 | 0.117311     | 31.36624             | 25.59948             |
| North 1300 vs.<br>South 1300 | 179.5000        | 192.4167        | -1.01956 | 22 | 0.319018 | -1.01956             | 16.83156 | 0.322368     | 20.72109             | 38.68629             |
| North 1400 vs.<br>South 1400 | 207.6667        | 227.2500        | -1.38667 | 22 | 0.179434 | -1.38667             | 21.99796 | 0.179435     | 34.42603             | 34.75924             |
| North 1500 vs.<br>South 1500 | 215.5000        | 239.1667        | -1.21484 | 22 | 0.237305 | -1.21484             | 21.99820 | 0.237306     | 47.93461             | 47.50279             |
| North 1600 vs.<br>South 1600 | 187.2727        | 241.5000        | -2.60781 | 21 | 0.016432 | -2.62727             | 20.88837 | 0.015788     | 45.39183             | 53.52060             |
| North 1700 vs.<br>South 1700 | 170.1000        | 192.9167        | -1.09858 | 20 | 0.285002 | -1.12861             | 19.81173 | 0.272545     | 40.50912             | 54.17893             |

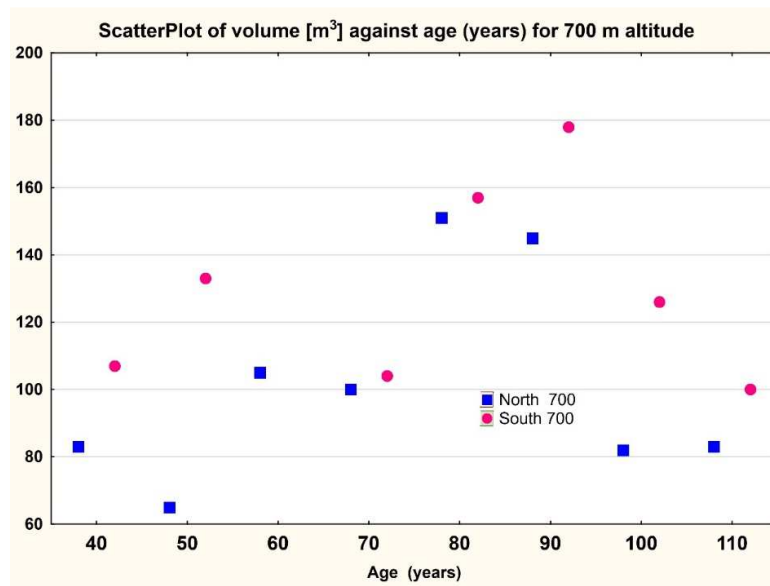

Fig. SC.1. – Scatter Plot for altitude of 700 m

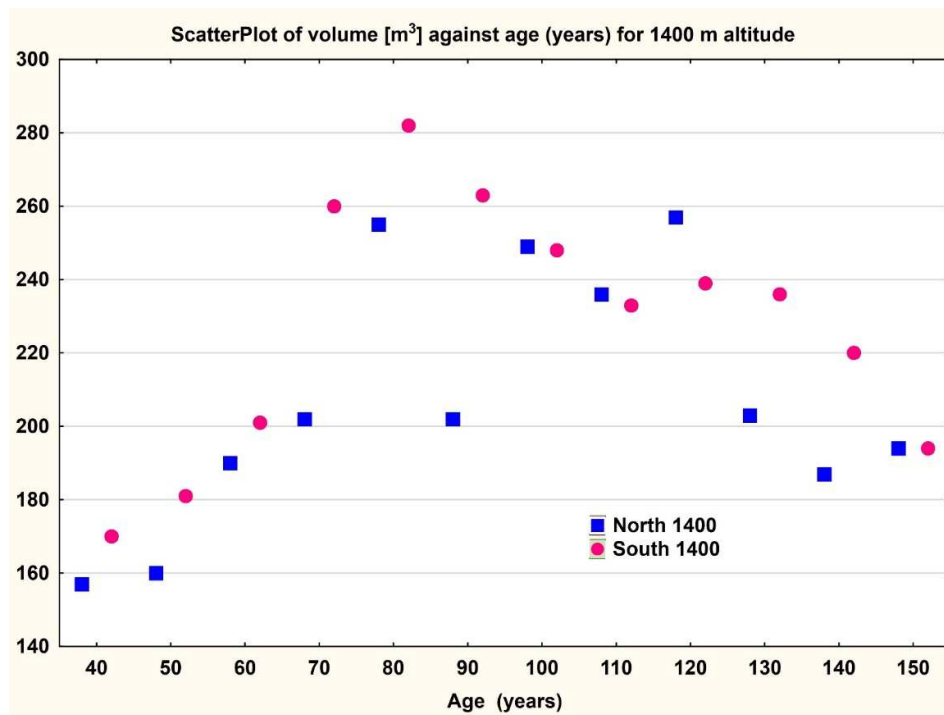

Fig. SC.2. – Scatter Plot for altitude of 1400 m

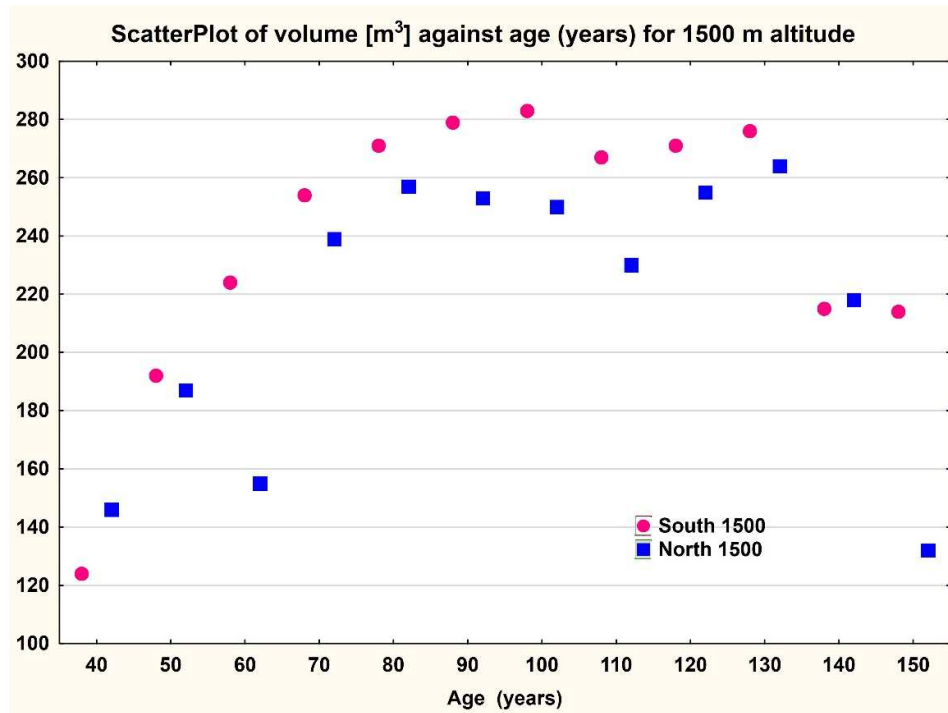

Fig. SC.3. – Scatter Plot for altitude of 1500 m

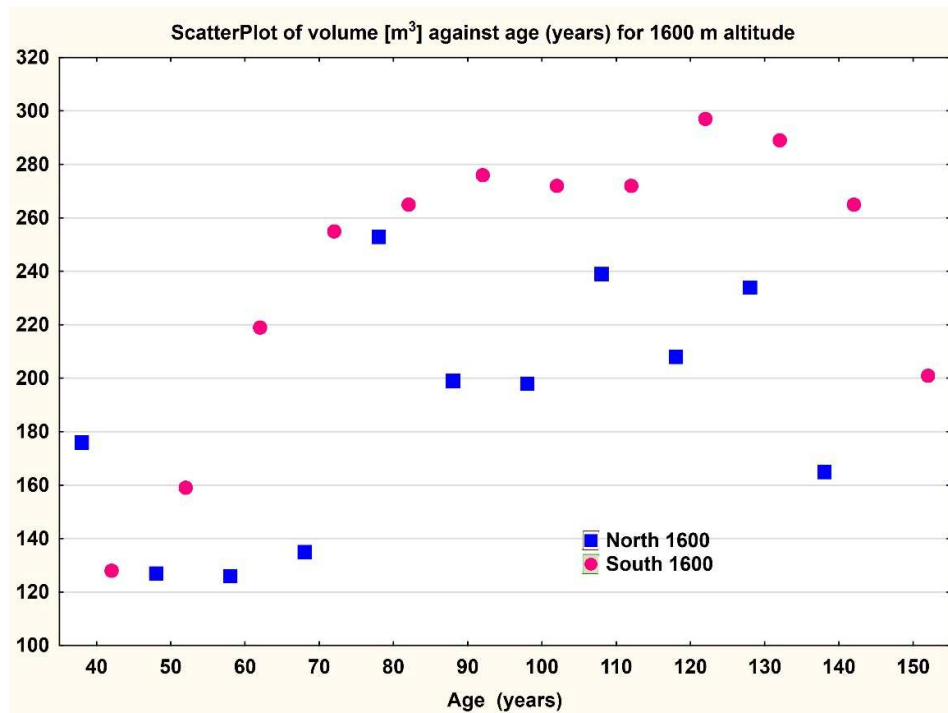

Fig. SC.3. – Scatter Plot for altitude of 1600 m

Table SC.4. Univariate Tests of Significance, Effect Sizes, and Powers for Southern Carpathians North-South database Sigma-restricted parameterization Effective hypothesis decomposition

| Effect       | SS       | Degr. of Freedom | MS       | F        | p        | Partial eta-squared | Non-centrality |
|--------------|----------|------------------|----------|----------|----------|---------------------|----------------|
| Intercept    | 27.4     | 1                | 27.43    | 0.01749  | 0.895038 | 0.000173            | 0.01749        |
| Age (years)  | 11799.2  | 1                | 11799.24 | 7.52500  | 0.007201 | 0.069339            | 7.52500        |
| Altitude (m) | 95092.8  | 1                | 95092.76 | 60.64567 | 0.000000 | 0.375177            | 60.64567       |
| Error        | 158368.6 | 101              | 1568.01  |          |          |                     |                |

Table SC.5. Test of SS Whole Model vs. SS Residual - Southern Carpathians North-South database

| Dependent Variable   |            |                         |                         |          |          |          |             |             |             |          |          |
|----------------------|------------|-------------------------|-------------------------|----------|----------|----------|-------------|-------------|-------------|----------|----------|
|                      | Multiple R | Multiple R <sup>2</sup> | Adjusted R <sup>2</sup> | SS Model | df Model | MS Model | SS Residual | df Residual | MS Residual | F        | p        |
| T3_North Volume (m3) | 0.646854   | 0.418420                | 0.406904                | 113938.9 | 2        | 56969.46 | 158368.6    | 101         | 1568.006    | 36.33243 | 0.000000 |

Table SC.6. Univariate Tests of Significance, Effect Sizes, and Powers for Southern Carpathians North-South database Sigma-restricted parameterization Effective hypothesis decomposition

| Effect       | SS       | Degr. of Freedom | MS       | F        | p        | Partial eta-squared | Non-centrality |
|--------------|----------|------------------|----------|----------|----------|---------------------|----------------|
| Intercept    | 1248.6   | 1                | 1248.6   | 0.60884  | 0.436855 | 0.005359            | 0.60884        |
| Age (years)  | 5175.7   | 1                | 5175.7   | 2.52375  | 0.114938 | 0.021846            | 2.52375        |
| Altitude (m) | 190591.4 | 1                | 190591.4 | 92.93534 | 0.000000 | 0.451284            | 92.93534       |
| Error        | 231739.9 | 113              | 2050.8   |          |          |                     |                |

Table SC.7. Test of SS Whole Model vs. SS Residual (Southern Carpathians North-South database)

| Dependent Variable   | Multiple R | Multiple R <sup>2</sup> | Adjusted R <sup>2</sup> | SS Model | df Model | MS Model | SS Residual | df Residual | MS Residual | F        | p        |
|----------------------|------------|-------------------------|-------------------------|----------|----------|----------|-------------|-------------|-------------|----------|----------|
| T3_South Volume (m3) | 0.687109   | 0.472118                | 0.462775                | 207259.9 | 2        | 103629.9 | 231739.9    | 113         | 2050.796    | 50.53158 | 0.000000 |

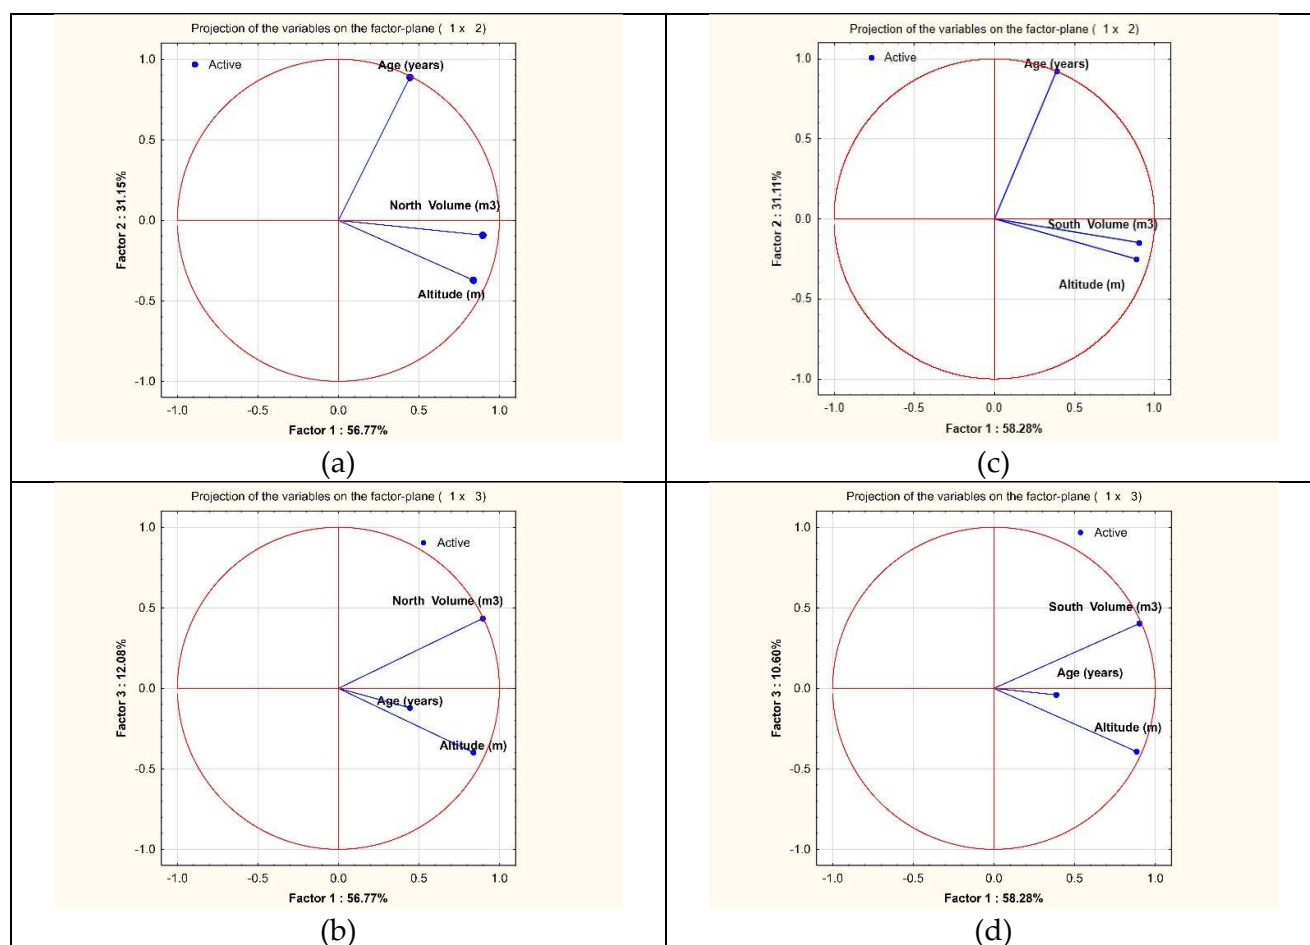

Fig. C.3 – PCA representation for (Southern Carpathians database)

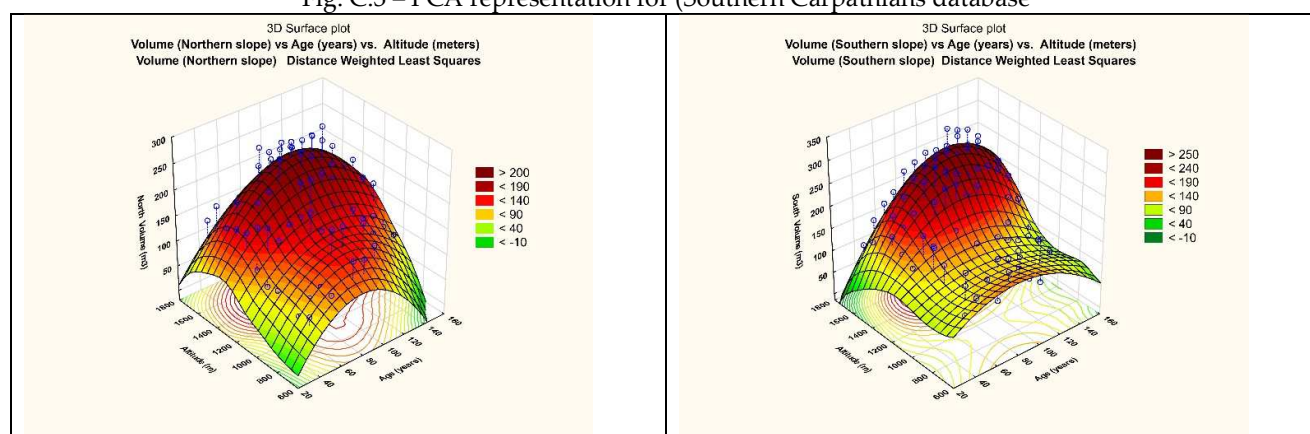

Fig. SC.4 – Scatter plot representation for (Southern Carpathians database)

## Section D - Southern Carpathians (East of Olt) north south slope database

Table SD.0. Correlations (Southern Carpathians (East of Olt)) Marked correlations are significant at  $p < .05000$  N=107 (Case wise deletion of missing data)

| Variable          | South Volume (m <sup>3</sup> ) | North Volume (m <sup>3</sup> ) |
|-------------------|--------------------------------|--------------------------------|
| South Volume (m3) | 1.0000                         | .4606                          |
|                   | p= ---                         | p=.000                         |
| North Volume (m3) | .4606                          | 1.0000                         |
|                   | p=.000                         | p= ---                         |

Table SD.1. Descriptive Statistics Southern Carpathians (East of Olt) Northern slope database

| Variable   |         |          |          |          |          |                |
|------------|---------|----------|----------|----------|----------|----------------|
|            | Valid N | Mean     | Minimum  | Maximum  | Std.Dev. | Standard Error |
| North 700  | 7       | 165.1429 | 95.0000  | 210.0000 | 40.44514 | 15.28683       |
| North 800  | 10      | 166.7000 | 112.0000 | 213.0000 | 40.86305 | 12.92203       |
| North 900  | 11      | 167.9091 | 122.0000 | 236.0000 | 39.27201 | 11.84096       |
| North 1000 | 12      | 169.0000 | 100.0000 | 229.0000 | 43.12983 | 12.45051       |
| North 1100 | 12      | 173.9167 | 119.0000 | 213.0000 | 35.44896 | 10.23323       |
| North 1200 | 12      | 173.7500 | 118.0000 | 239.0000 | 46.65565 | 13.46833       |
| North 1300 | 12      | 184.0000 | 129.0000 | 245.0000 | 35.73386 | 10.31548       |
| North 1400 | 12      | 199.8333 | 105.0000 | 243.0000 | 39.63661 | 11.44210       |
| North 1500 | 12      | 180.5000 | 99.0000  | 228.0000 | 42.88356 | 12.37942       |
| North 1600 | 12      | 187.0000 | 106.0000 | 232.0000 | 36.53392 | 10.54643       |
| North 1700 | 1       | 123.0000 | 123.0000 | 123.0000 |          |                |

Table SD.2. Descriptive Statistics Southern Carpathians (East of Olt) north south slope database

| Variable   | Valid N | Mean     | Minimum  | Maximum  | Std. Dev. | Standard Error |
|------------|---------|----------|----------|----------|-----------|----------------|
| South 700  | 7       | 186.1429 | 128.0000 | 213.0000 | 27.08892  | 10.23865       |
| South 800  | 7       | 186.7143 | 112.0000 | 221.0000 | 36.99421  | 13.98250       |
| South 900  | 10      | 176.3000 | 117.0000 | 235.0000 | 38.59778  | 12.20569       |
| South 1000 | 12      | 171.8333 | 132.0000 | 248.0000 | 36.95657  | 10.66844       |
| South 1100 | 12      | 171.0000 | 116.0000 | 231.0000 | 37.92097  | 10.94684       |
| South 1200 | 12      | 156.5000 | 109.0000 | 223.0000 | 32.84814  | 9.48244        |
| South 1300 | 12      | 160.9167 | 127.0000 | 198.0000 | 21.99776  | 6.35021        |
| South 1400 | 12      | 192.5833 | 163.0000 | 224.0000 | 19.92923  | 5.75307        |
| South 1500 | 12      | 209.9167 | 165.0000 | 258.0000 | 27.31120  | 7.88406        |
| South 1600 | 12      | 193.3333 | 142.0000 | 233.0000 | 25.59593  | 7.38891        |



|            |    |          |         |          |          |         |
|------------|----|----------|---------|----------|----------|---------|
| South 1700 | 12 | 151.8333 | 96.0000 | 189.0000 | 28.56518 | 8.24606 |
|------------|----|----------|---------|----------|----------|---------|

## Descriptive Statistics

| Variable          | Valid N | Mean     | Minimum  | Maximum  | Std.Dev. | Standard Error |
|-------------------|---------|----------|----------|----------|----------|----------------|
| North Volume (m3) | 113     | 177.0708 | 95.00000 | 245.0000 | 40.06729 | 3.769214       |
| South Volume (m3) | 120     | 177.2333 | 96.00000 | 258.0000 | 34.25969 | 3.127468       |

Table SD.3. T-test for Independent Samples - Southern Carpathians (East of Olt) North South slope database

| Group 1 vs. Group 2       | Mean Group 1 | Mean Group 2 | t-value  | df | p        | t separ. var.est. | df       | p 2-sided | Std. Dev. Group 1 | Std. Dev. Group 2 |
|---------------------------|--------------|--------------|----------|----|----------|-------------------|----------|-----------|-------------------|-------------------|
| North 700 vs. South 700   | 165.1429     | 186.1429     | -1.14138 | 12 | 0.275979 | -1.14138          | 10.48130 | 0.279120  | 40.44514          | 27.08892          |
| North 800 vs. South 800   | 166.7000     | 186.7143     | -1.03180 | 15 | 0.318515 | -1.05122          | 13.87712 | 0.311121  | 40.86305          | 36.99421          |
| North 900 vs. South 900   | 167.9091     | 176.3000     | -0.49300 | 19 | 0.627665 | -0.49342          | 18.86977 | 0.627407  | 39.27201          | 38.59778          |
| North 1000 vs. South 1000 | 169.0000     | 171.8333     | -0.17281 | 22 | 0.864384 | -0.17281          | 21.49515 | 0.864421  | 43.12983          | 36.95657          |
| North 1100 vs. South 1100 | 173.9167     | 171.0000     | 0.19464  | 22 | 0.847462 | 0.19464           | 21.90078 | 0.847470  | 35.44896          | 37.92097          |
| North 1200 vs. South 1200 | 173.7500     | 156.5000     | 1.04726  | 22 | 0.306350 | 1.04726           | 19.75423 | 0.307625  | 46.65565          | 32.84814          |
| North 1300 vs. South 1300 | 184.0000     | 160.9167     | 1.90560  | 22 | 0.069853 | 1.90560           | 18.29022 | 0.072544  | 35.73386          | 21.99776          |
| North 1400 vs. South 1400 | 199.8333     | 192.5833     | 0.56610  | 22 | 0.577058 | 0.56610           | 16.22764 | 0.579074  | 39.63661          | 19.92923          |
| North 1500 vs. South 1500 | 180.5000     | 209.9167     | -2.00430 | 22 | 0.057501 | -2.00430          | 18.66264 | 0.059769  | 42.88356          | 27.31120          |
| North 1600 vs. South 1600 | 187.0000     | 193.3333     | -0.49182 | 22 | 0.627715 | -0.49182          | 19.70208 | 0.628279  | 36.53392          | 25.59593          |
| North 1700 vs. South 1700 | 123.0000     | 151.8333     | -0.96979 | 11 | 0.352993 |                   |          |           | 0.00000           | 28.56518          |

## T-test for Independent Samples Note: Variables were treated as independent samples

| Group 1 vs. Group 2               | Mean Group 1 | Mean Group 2 | t-value  | df  | p        | t separ. var.est. | df       | p 2-sided | Std. Dev. Group 1 | Std. Dev. Group 2 |
|-----------------------------------|--------------|--------------|----------|-----|----------|-------------------|----------|-----------|-------------------|-------------------|
| Volume (North) vs. Volume (South) | 177.0708     | 175.7750     | 0.269838 | 231 | 0.787525 | 0.268301          | 217.5575 | 0.788722  | 40.06729          | 33.07884          |

Fig. D.1. – Scatter Plot for altitude of 1600 m

Table SD.4. Univariate Tests of Significance for Volume (Northern slope) (Sigma-restricted parameterization Effective hypothesis decomposition;

| Effect            | SS       | Degr. of Freedom | MS       | F        | p        | Partial eta-squared | Non-centrality |
|-------------------|----------|------------------|----------|----------|----------|---------------------|----------------|
| Intercept         | 74000.0  | 1                | 73999.97 | 48.74721 | 0.000000 | 0.307074            | 48.74721       |
| Age (years)       | 6645.6   | 1                | 6645.57  | 4.37774  | 0.038712 | 0.038274            | 4.37774        |
| Altitude (meters) | 5005.0   | 1                | 5004.98  | 3.29701  | 0.072130 | 0.029101            | 3.29701        |
| Error             | 166983.9 | 110              | 1518.04  |          |          |                     |                |

Table SD.5. Test of SS Whole Model vs. SS Residual (Southern Carpathians (East of Olt)) – Northern slope

| Dependent Variable | Multiple R | Multiple R <sup>2</sup> | Adjusted R <sup>2</sup> | SS Model | df Model | MS Model | SS Residual | df Residual | MS Residual | F        | p        |
|--------------------|------------|-------------------------|-------------------------|----------|----------|----------|-------------|-------------|-------------|----------|----------|
| Volume (North)     | 0.267016   | 0.071298                | 0.054412                | 12819.58 | 2        | 6409.789 | 166983.9    | 110         | 1518.035    | 4.222425 | 0.017108 |

Table SD.6. Univariate Tests of Significance, Effect Sizes, and Powers for Volume (Southern slope) Sigma-restricted parameterization Effective hypothesis decomposition

| Effect            | SS       | Degr. of Freedom | MS       | F        | p        | Partial eta-squared | Non-centrality |
|-------------------|----------|------------------|----------|----------|----------|---------------------|----------------|
| Intercept         | 177483.9 | 1                | 177483.9 | 159.8438 | 0.000000 | 0.577379            | 159.8438       |
| Age (years)       | 214.5    | 1                | 214.5    | 0.1931   | 0.661130 | 0.001648            | 0.1931         |
| Altitude (meters) | 44.5     | 1                | 44.5     | 0.0401   | 0.841663 | 0.000342            | 0.0401         |
| Error             | 129911.9 | 117              | 1110.4   |          |          |                     |                |

Table S D.7. Test of SS Whole Model vs. SS Residual (Southern Carpathians (East of Olt)) – Southern slope

| Dependent Variable | Multiple R | Multiple R <sup>2</sup> | Adjusted R <sup>2</sup> | SS Model | df Model | MS Model | SS Residual | df Residual | MS Residual | F        | p        |
|--------------------|------------|-------------------------|-------------------------|----------|----------|----------|-------------|-------------|-------------|----------|----------|
| Volume (South)     | 0.047919   | 0.002296                | -0.014758               | 298.9990 | 2        | 149.4995 | 129911.9    | 117         | 1110.358    | 0.134641 | 0.874165 |

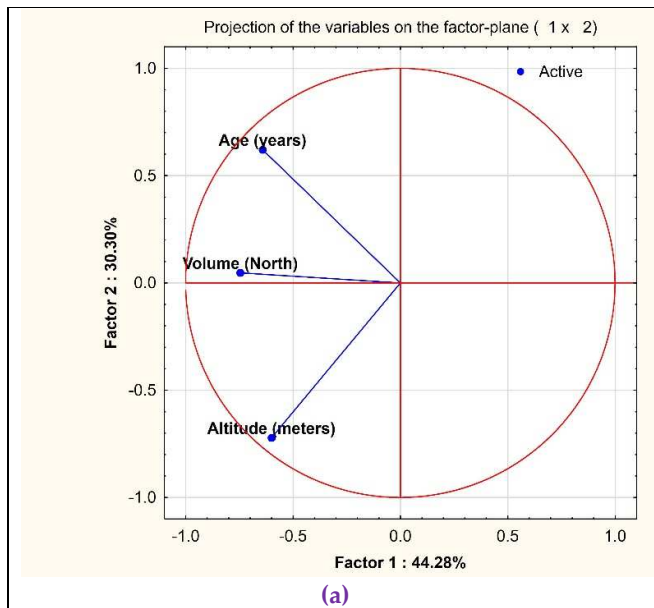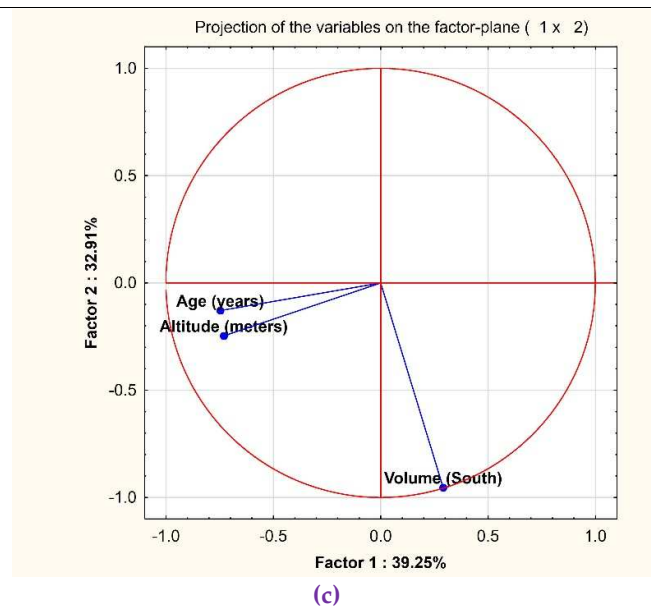

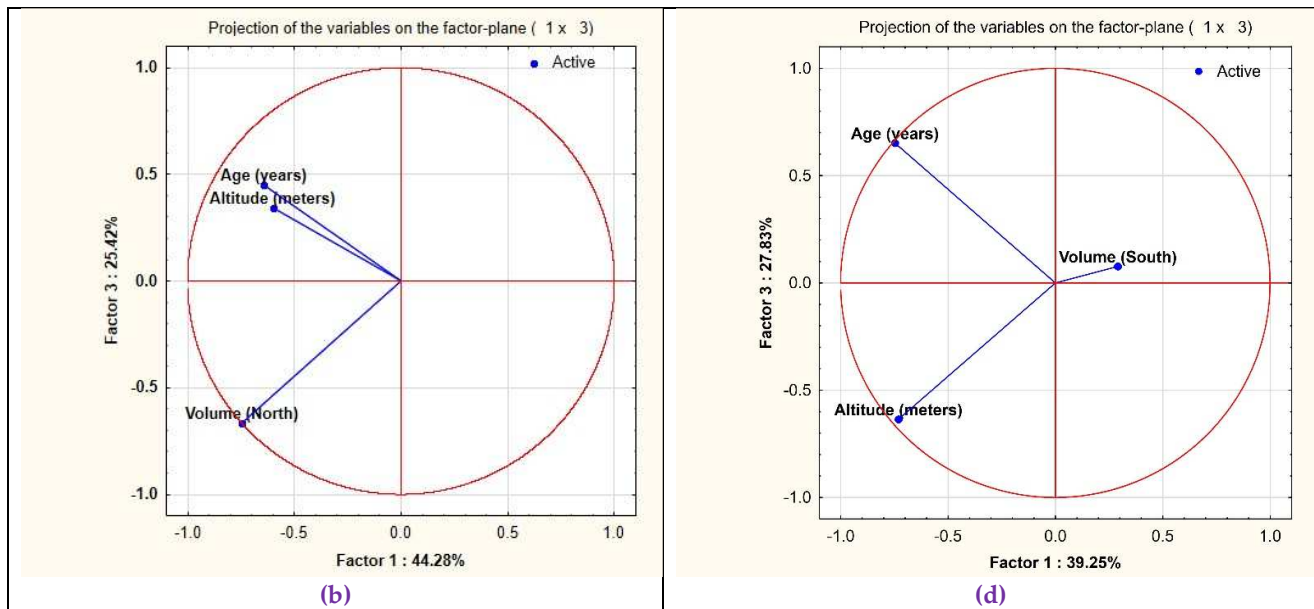

Fig. SD.3 – PCA representation for South and North database

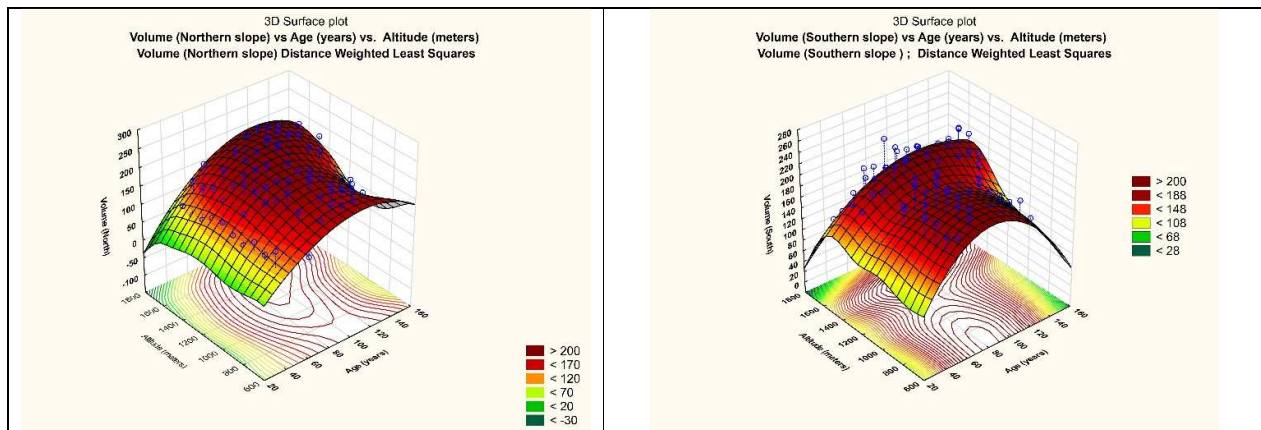

Fig. SD.4 – Surface plots representation for South and North database

## Section E - Southern Carpathians North-South (Total) database

Table SE.0. Correlations (Southern Carpathians North-South (Total) full database) Marked correlations are significant at  $p < .05000$  N=122 (Case wise deletion of missing data)

| Variable       | Volume (North) | Volume (South) |
|----------------|----------------|----------------|
| Volume (North) | 1.0000         | .6068          |
|                | p= ---         | p=.000         |
| Volume (South) | .6068          | 1.0000         |
|                | p=.000         | p= ---         |

Table SE.1. Descriptive Statistics Southern Carpathians North-South (Total) database - Northern slope database

| Variable   | Valid N | Mean     | Minimum  | Maximum  | Std. Dev. | Standard Error |
|------------|---------|----------|----------|----------|-----------|----------------|
| North 700  | 8       | 133.2500 | 96.0000  | 187.0000 | 31.12532  | 11.00446       |
| North 800  | 10      | 151.9000 | 103.0000 | 212.0000 | 38.24904  | 12.09541       |
| North 900  | 11      | 163.1818 | 128.0000 | 206.0000 | 26.75750  | 8.06769        |
| North 1000 | 12      | 162.9167 | 106.0000 | 208.0000 | 38.00110  | 10.96997       |
| North 1100 | 12      | 161.9167 | 108.0000 | 209.0000 | 33.07143  | 9.54690        |
| North 1200 | 12      | 172.6667 | 121.0000 | 220.0000 | 35.57664  | 10.27009       |
| North 1300 | 12      | 182.5000 | 151.0000 | 223.0000 | 25.39685  | 7.33144        |
| North 1400 | 12      | 200.4167 | 140.0000 | 234.0000 | 28.82379  | 8.32071        |
| North 1500 | 12      | 196.3333 | 136.0000 | 236.0000 | 37.71986  | 10.88879       |
| North 1600 | 12      | 190.4167 | 146.0000 | 235.0000 | 31.00574  | 8.95059        |
| North 1700 | 10      | 167.1000 | 102.0000 | 226.0000 | 42.46947  | 13.43002       |

Table SE.2. Descriptive Statistics Southern Carpathians North-South (Total) database - Southern slope database

| Variable   | Valid N | Mean     | Minimum  | Maximum  | Std. Dev. | Standard Error |
|------------|---------|----------|----------|----------|-----------|----------------|
| South 700  | 8       | 158.8750 | 100.0000 | 194.0000 | 32.05102  | 11.33175       |
| South 800  | 9       | 165.1111 | 92.0000  | 229.0000 | 44.16572  | 14.72191       |
| South 900  | 12      | 150.3333 | 97.0000  | 222.0000 | 40.56719  | 11.71074       |
| South 1000 | 12      | 155.0000 | 118.0000 | 231.0000 | 35.47342  | 10.24029       |
| South 1100 | 12      | 153.9167 | 108.0000 | 201.0000 | 35.26641  | 10.18054       |
| South 1200 | 12      | 149.4167 | 107.0000 | 196.0000 | 26.14803  | 7.54829        |
| South 1300 | 12      | 181.8333 | 132.0000 | 231.0000 | 31.84860  | 9.19390        |
| South 1400 | 12      | 215.0000 | 166.0000 | 265.0000 | 29.67092  | 8.56526        |
| South 1500 | 12      | 225.7500 | 151.0000 | 258.0000 | 33.46674  | 9.66102        |
| South 1600 | 12      | 216.7500 | 136.0000 | 253.0000 | 35.79773  | 10.33391       |
| South 1700 | 12      | 174.3333 | 109.0000 | 244.0000 | 37.69575  | 10.88183       |

Table SE.3. T-test for Independent Samples Southern Carpathians North-South (Total) database Note: Variables were treated as independent samples

| Group 1 vs. Group 2     | Mean Group 1 | Mean Group 2 | t-value  | df | p        | t separ. var.est. | df       | p 2-sided | Std. Dev. Group 1 | Std. Dev. Group 2 |
|-------------------------|--------------|--------------|----------|----|----------|-------------------|----------|-----------|-------------------|-------------------|
| North 700 vs. South 700 | 133.2500     | 158.8750     | -1.62227 | 14 | 0.127042 | -1.62227          | 13.98799 | 0.127061  | 31.12532          | 32.05102          |
| North 800 vs. South 800 | 151.9000     | 165.1111     | -0.69892 | 17 | 0.494057 | -0.69337          | 15.97517 | 0.498035  | 38.24904          | 44.16572          |

|                                 |          |          |          |    |          |          |          |          |          |          |
|---------------------------------|----------|----------|----------|----|----------|----------|----------|----------|----------|----------|
| North 900<br>vs. South<br>900   | 163.1818 | 150.3333 | 0.88746  | 21 | 0.384884 | 0.90350  | 19.16934 | 0.377473 | 26.75750 | 40.56719 |
| North 1000<br>vs. South<br>1000 | 162.9167 | 155.0000 | 0.52754  | 22 | 0.603100 | 0.52754  | 21.89659 | 0.603125 | 38.00110 | 35.47342 |
| North 1100<br>vs. South<br>1100 | 161.9167 | 153.9167 | 0.57321  | 22 | 0.572319 | 0.57321  | 21.90977 | 0.572342 | 33.07143 | 35.26641 |
| North 1200<br>vs. South<br>1200 | 172.6667 | 149.4167 | 1.82415  | 22 | 0.081743 | 1.82415  | 20.19969 | 0.082959 | 35.57664 | 26.14803 |
| North 1300<br>vs. South<br>1300 | 182.5000 | 181.8333 | 0.05669  | 22 | 0.955301 | 0.05669  | 20.96153 | 0.955326 | 25.39685 | 31.84860 |
| North 1400<br>vs. South<br>1400 | 200.4167 | 215.0000 | -1.22124 | 22 | 0.234922 | -1.22124 | 21.98157 | 0.234933 | 28.82379 | 29.67092 |
| North 1500<br>vs. South<br>1500 | 196.3333 | 225.7500 | -2.02082 | 22 | 0.055635 | -2.02082 | 21.69247 | 0.055813 | 37.71986 | 33.46674 |
| North 1600<br>vs. South<br>1600 | 190.4167 | 216.7500 | -1.92618 | 22 | 0.067100 | -1.92618 | 21.56076 | 0.067367 | 31.00574 | 35.79773 |
| North 1700<br>vs. South<br>1700 | 167.1000 | 174.3333 | -0.42324 | 20 | 0.676637 | -0.41847 | 18.25789 | 0.680486 | 42.46947 | 37.69575 |

Table SE.4. Univariate Tests of Significance for Volume - Southern Carpathians North-South (Total) database (Northern slope) (Sigma-restricted parameterization Effective hypothesis decomposition;

| Effect            | SS       | Degr. of Freedom | MS       | F        | p        | Partial eta-squared | Non-centrality |
|-------------------|----------|------------------|----------|----------|----------|---------------------|----------------|
| Intercept         | 47480.3  | 1                | 47480.30 | 42.69398 | 0.000000 | 0.262419            | 42.69398       |
| Age (years)       | 10791.9  | 1                | 10791.86 | 9.70397  | 0.002300 | 0.074816            | 9.70397        |
| Altitude (meters) | 21237.3  | 1                | 21237.32 | 19.09646 | 0.000027 | 0.137289            | 19.09646       |
| Error             | 133452.9 | 120              | 1112.11  |          |          |                     |                |

Table SE.5. Test of SS Whole Model vs. SS Residual (Southern Carpathians North-South (Total) full database ) (Northern slope)

|                | Multiple R | Multiple R <sup>2</sup> | Adjusted R <sup>2</sup> | SS Model | df Model | MS Model | SS Residual | df Residual | MS Residual | F        | p        |
|----------------|------------|-------------------------|-------------------------|----------|----------|----------|-------------|-------------|-------------|----------|----------|
| Volume (North) | 0.459176   | 0.210842                | 0.197690                | 35655.16 | 2        | 17827.58 | 133452.9    | 120         | 1112.108    | 16.03045 | 0.000001 |

Table SE.6. Univariate Tests of Significance for Volume - Southern Carpathians North-South (Total) database (Southern slope) (Sigma-restricted parameterization Effective hypothesis decomposition)

| Effect            | SS       | Degr. of Freedom | MS       | F        | p        | Partial eta-squared | Non-centrality |
|-------------------|----------|------------------|----------|----------|----------|---------------------|----------------|
| Intercept         | 61726.2  | 1                | 61726.16 | 39.53693 | 0.000000 | 0.244755            | 39.53693       |
| Age (years)       | 606.7    | 1                | 606.73   | 0.38862  | 0.534188 | 0.003175            | 0.38862        |
| Altitude (meters) | 47219.5  | 1                | 47219.50 | 30.24510 | 0.000000 | 0.198661            | 30.24510       |
| Error             | 190469.8 | 122              | 1561.23  |          |          |                     |                |

Test of SS Whole Model vs. SS Residual (Southern Carpathians North-South (Total) full database) (Southern slope)

| Dependent Variable | Multiple R | Multiple R <sup>2</sup> | Adjusted R <sup>2</sup> | SS Model | df Model | MS Model | SS Residual | df Residual | MS Residual | F        | p        |
|--------------------|------------|-------------------------|-------------------------|----------|----------|----------|-------------|-------------|-------------|----------|----------|
| Volume (South)     | 0.445716   | 0.198663                | 0.185526                | 47220.19 | 2        | 23610.09 | 190469.8    | 122         | 1561.228    | 15.12277 | 0.000001 |

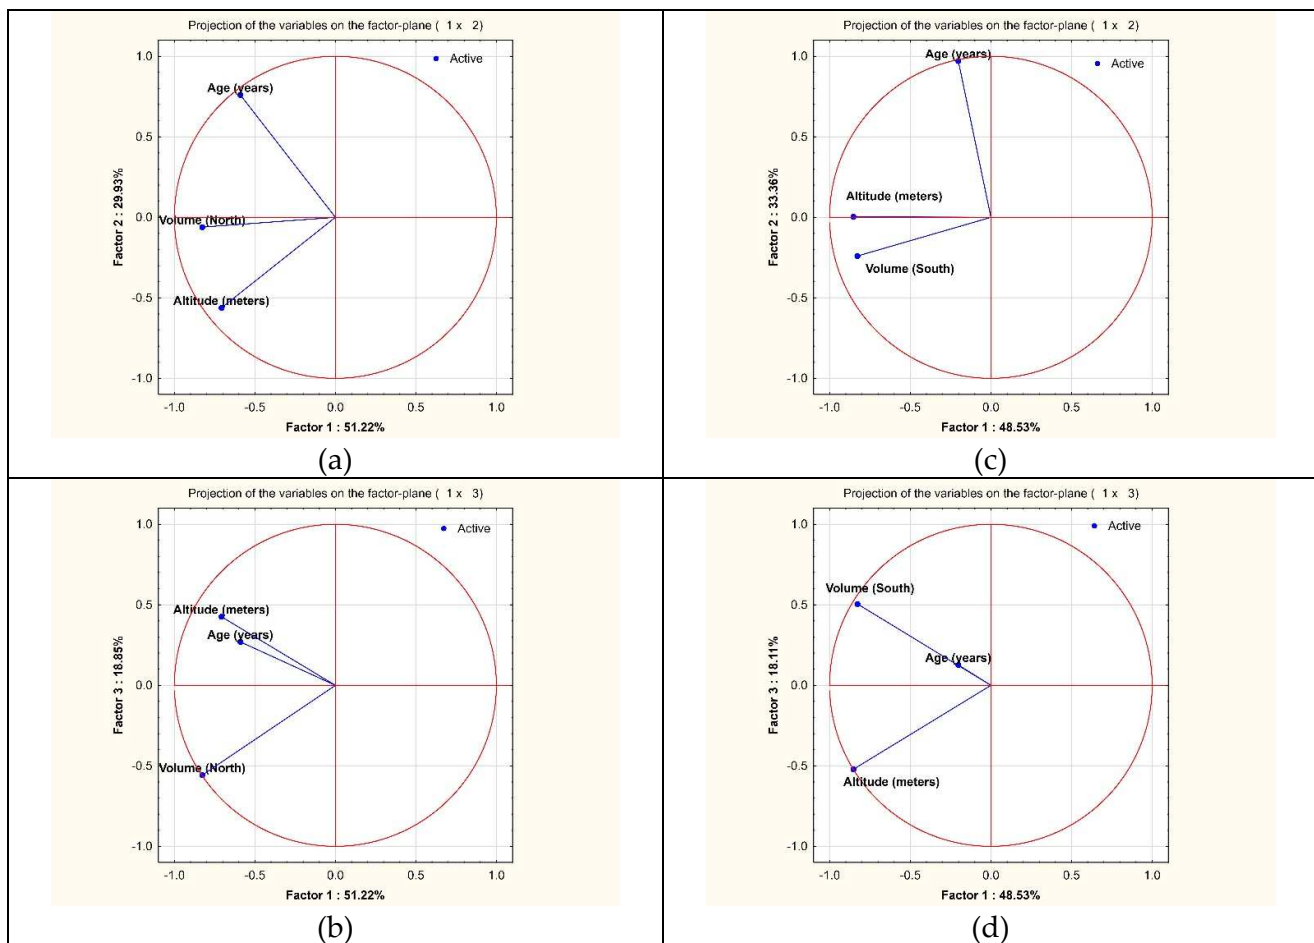

Fig. SE.3 – PCA representation for Southern Carpathians North-South (Total) database

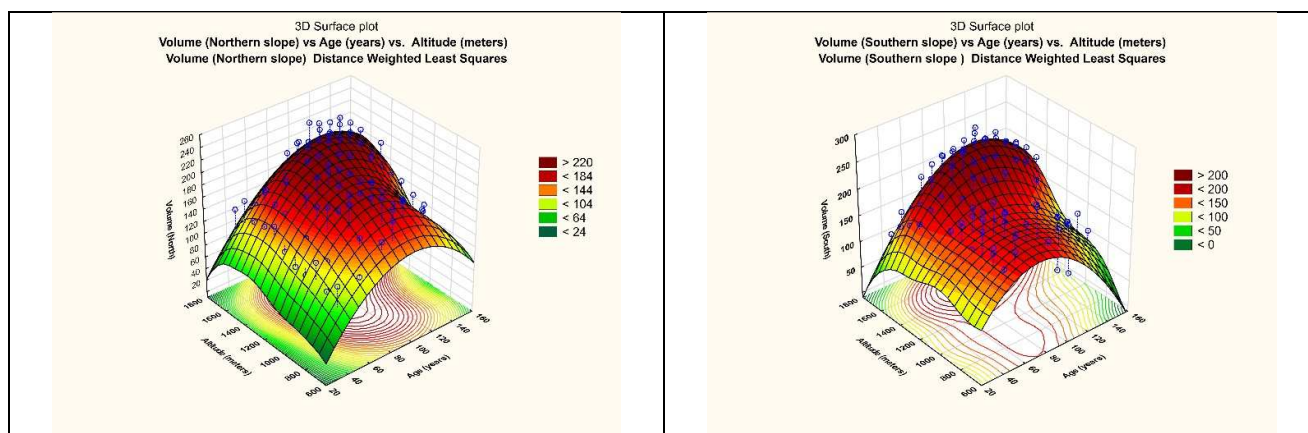

Fig. SE.4 – Surface plots representation for Southern Carpathians North-South (Total) database

## Section G - Table 7 Eastern Carpathians (East West slope) database

Table SG.1. Descriptive Statistics Eastern Carpathians (Eastern slope) database

| Variable  | Valid N | Mean     | Minimum  | Maximum  | Std. Dev. | Standard Error |
|-----------|---------|----------|----------|----------|-----------|----------------|
| East 700  | 5       | 231.4000 | 195.0000 | 249.0000 | 21.80138  | 9.74987        |
| East 800  | 9       | 192.5556 | 136.0000 | 271.0000 | 43.18307  | 14.39436       |
| East 900  | 10      | 179.1000 | 124.0000 | 259.0000 | 44.08439  | 13.94071       |
| East 1000 | 10      | 187.3000 | 114.0000 | 263.0000 | 49.79748  | 15.74735       |
| East 1100 | 10      | 170.9000 | 110.0000 | 235.0000 | 39.11933  | 12.37062       |
| East 1200 | 10      | 173.8000 | 104.0000 | 240.0000 | 45.89311  | 14.51268       |
| East 1300 | 10      | 182.9000 | 101.0000 | 231.0000 | 42.29381  | 13.37448       |
| East 1400 | 10      | 189.8000 | 129.0000 | 272.0000 | 51.32424  | 16.23015       |
| East 1500 | 9       | 184.3333 | 119.0000 | 272.0000 | 47.47631  | 15.82544       |
| East 1600 | 8       | 174.1250 | 114.0000 | 278.0000 | 61.64515  | 21.79485       |
| East 1700 | 1       | 123.0000 | 123.0000 | 123.0000 |           |                |

Table SG.2. Descriptive Statistics - Eastern Carpathians (Western slope) database

|          | Valid N | Mean     | Minimum | Maximum  | Std. Dev. | Standard Error |
|----------|---------|----------|---------|----------|-----------|----------------|
| West 700 | 8       | 140.1250 | 85.0000 | 192.0000 | 39.62841  | 14.01076       |
| West 800 | 10      | 122.7000 | 84.0000 | 166.0000 | 25.23247  | 7.97921        |
| West 900 | 10      | 116.8000 | 69.0000 | 180.0000 | 36.17181  | 11.43853       |

|           |    |          |          |          |          |          |
|-----------|----|----------|----------|----------|----------|----------|
| West 1000 | 10 | 122.5000 | 88.0000  | 158.0000 | 26.33650 | 8.32833  |
| West 1100 | 10 | 139.4000 | 96.0000  | 199.0000 | 37.85117 | 11.96959 |
| West 1200 | 10 | 162.0000 | 107.0000 | 197.0000 | 34.62177 | 10.94836 |
| West 1300 | 10 | 175.0000 | 107.0000 | 241.0000 | 38.73557 | 12.24926 |
| West 1400 | 10 | 179.6000 | 121.0000 | 265.0000 | 50.99717 | 16.12672 |
| West 1500 | 10 | 168.4000 | 101.0000 | 240.0000 | 47.33615 | 14.96901 |
| West 1600 | 6  | 114.8333 | 78.0000  | 159.0000 | 35.74027 | 14.59090 |
| West 1700 | 0  |          |          |          |          |          |

Table SG.3 T-test for Independent Samples - Eastern Carpathians database Note: Variables were treated as independent samples

| Group 1 vs. Group 2     | Mean Group 1 | Mean Group 2 | t-value  | df | p        | t separ. var.est. | df       | p 2-sided | Std. Dev. Group 1 | Std. Dev. Group 2 |
|-------------------------|--------------|--------------|----------|----|----------|-------------------|----------|-----------|-------------------|-------------------|
| East 700 vs. West 700   | 231.4000     | 140.1250     | 4.676397 | 11 | 0.000675 | 5.347316          | 10.93400 | 0.000240  | 21.80138          | 39.62841          |
| East 1000 vs. West 1000 | 187.3000     | 122.5000     | 3.637580 | 18 | 0.001883 | 3.637580          | 13.66939 | 0.002788  | 49.79748          | 26.33650          |
| East 900 vs. West 900   | 179.1000     | 116.8000     | 3.454808 | 18 | 0.002826 | 3.454808          | 17.33877 | 0.002955  | 44.08439          | 36.17181          |
| East 1100 vs. West 1100 | 170.9000     | 139.4000     | 1.829963 | 18 | 0.083867 | 1.829963          | 17.98049 | 0.083886  | 39.11933          | 37.85117          |
| East 1500 vs. West 1500 | 184.3333     | 168.4000     | 0.731565 | 17 | 0.474399 | 0.731445          | 16.77962 | 0.474600  | 47.47631          | 47.33615          |
| East 1400 vs. West 1400 | 189.8000     | 179.6000     | 0.445807 | 18 | 0.661053 | 0.445807          | 17.99926 | 0.661053  | 51.32424          | 50.99717          |
| East 1300 vs. West 1300 | 182.9000     | 175.0000     | 0.435593 | 18 | 0.668310 | 0.435593          | 17.86275 | 0.668350  | 42.29381          | 38.73557          |

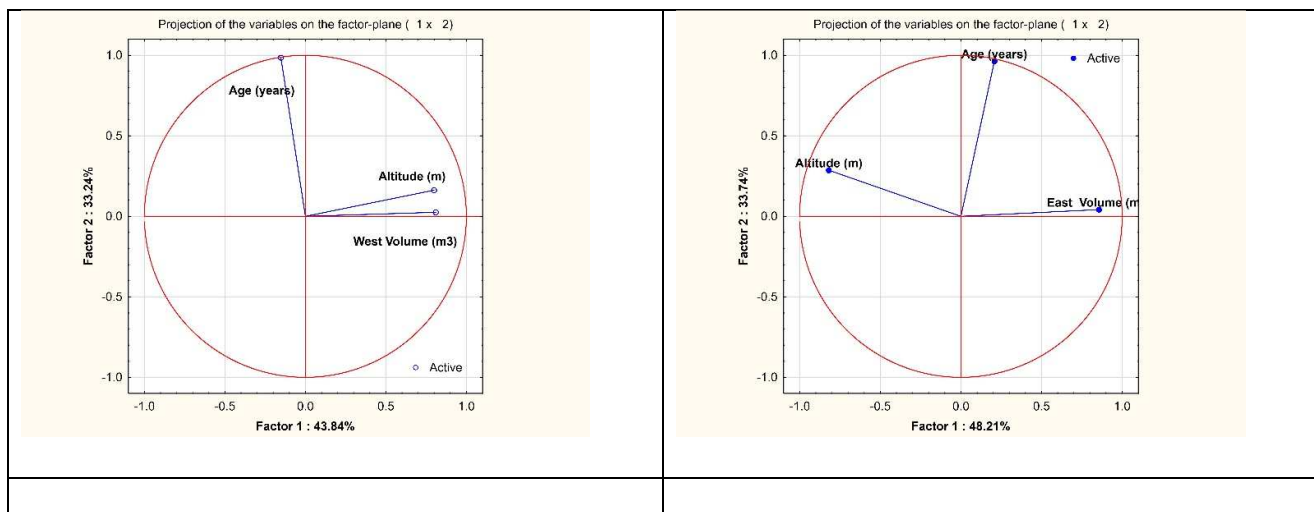



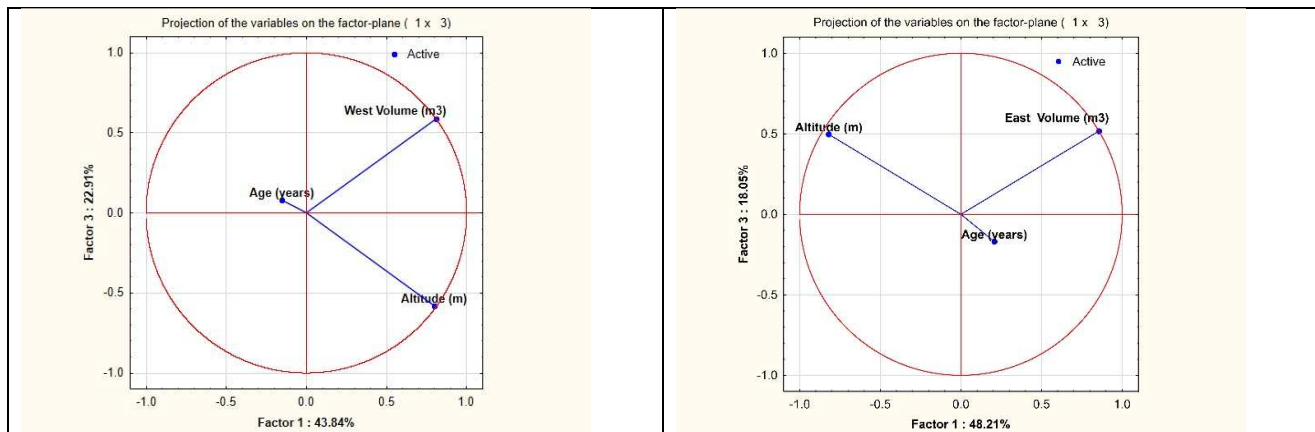

Fig. SG.3 – PCA representation for Eastern Carpathians database

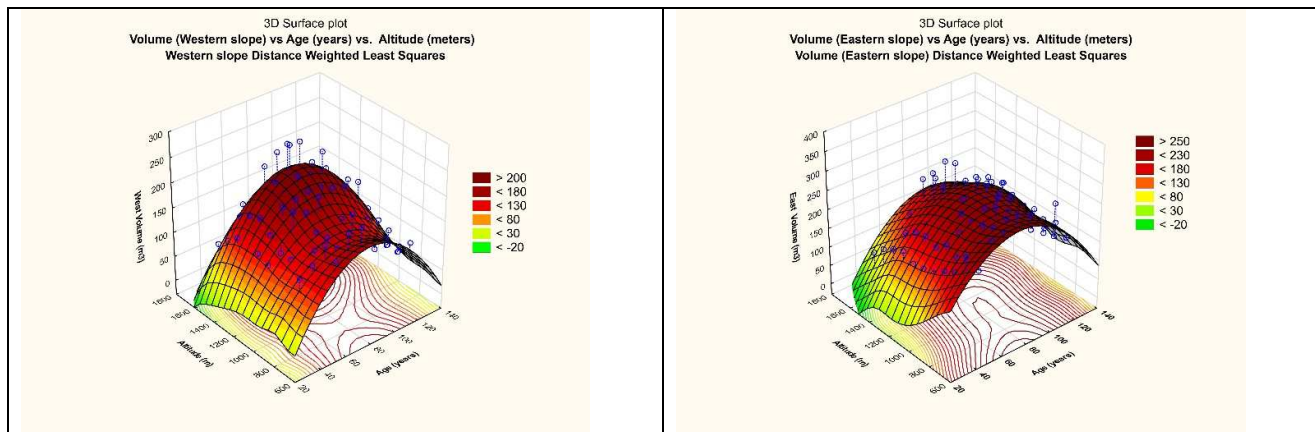

Fig. SG.4 – Surfaceplot representation for Eastern Carpathians database

## Section J - Table 10 Southern Carpathians Total Pure stands versus mixed stands

Table SJ.1 Descriptive Statistics

| Variable                 | Valid N | Mean     | Minimum  | Maximum  | Std. Dev. | Standard Error |
|--------------------------|---------|----------|----------|----------|-----------|----------------|
| Pure forest Volume (m3)  | 89      | 360.3596 | 133.0000 | 564.0000 | 99.78901  | 10.57761       |
| Mixed forest Volume (m3) | 110     | 146.1727 | 54.0000  | 216.0000 | 36.27794  | 3.45897        |

Table SJ.2. Descriptive Statistics

| Variable         | Valid N | Mean     | Minimum  | Maximum  | Std.Dev. | Standard Error |
|------------------|---------|----------|----------|----------|----------|----------------|
| Pure stands 700  | 5       | 456.2000 | 259.0000 | 700.000  | 169.7445 | 75.9121        |
| Pure stands 800  | 5       | 532.0000 | 417.0000 | 800.000  | 153.2531 | 68.5369        |
| Pure stands 900  | 7       | 484.5714 | 272.0000 | 900.000  | 201.0604 | 75.9937        |
| Pure stands 1000 | 9       | 471.4444 | 206.0000 | 1000.000 | 226.4349 | 75.4783        |
| Pure stands 1100 | 8       | 518.0000 | 197.0000 | 1100.000 | 262.1156 | 92.6718        |
| Pure stands 1200 | 11      | 463.6364 | 210.0000 | 1200.000 | 259.5324 | 78.2520        |
| Pure stands 1300 | 11      | 439.4545 | 192.0000 | 1300.000 | 296.2541 | 89.3240        |
| Pure stands 1400 | 11      | 439.6364 | 194.0000 | 1400.000 | 327.2972 | 98.6838        |
| Pure stands 1500 | 11      | 441.6364 | 174.0000 | 1500.000 | 358.0157 | 107.9458       |
| Pure stands 1600 | 11      | 418.4545 | 179.0000 | 1600.000 | 397.1613 | 119.7486       |
| Pure stands 1700 | 11      | 392.8182 | 133.0000 | 1700.000 | 438.0687 | 132.0827       |

Table SJ.3. Descriptive Statistics

| Variable          | Valid N | Mean     | Minimum  | Maximum  | Std.Dev. | Standard Error |
|-------------------|---------|----------|----------|----------|----------|----------------|
| Mixed stands 700  | 11      | 183.0909 | 93.0000  | 700.000  | 173.5410 | 52.3246        |
| Mixed stands 800  | 11      | 199.8182 | 89.0000  | 800.000  | 201.5881 | 60.7811        |
| Mixed stands 900  | 11      | 215.6364 | 100.0000 | 900.000  | 229.5353 | 69.2075        |
| Mixed stands 1000 | 11      | 223.0909 | 84.0000  | 1000.000 | 260.2301 | 78.4623        |
| Mixed stands 1100 | 11      | 228.1818 | 89.0000  | 1100.000 | 291.0886 | 87.7665        |
| Mixed stands 1200 | 11      | 235.4545 | 99.0000  | 1200.000 | 321.0328 | 96.7950        |
| Mixed stands 1300 | 11      | 255.9091 | 108.0000 | 1300.000 | 347.0946 | 104.6530       |
| Mixed stands 1400 | 11      | 283.1818 | 100.0000 | 1400.000 | 371.9225 | 112.1389       |
| Mixed stands 1500 | 11      | 289.9091 | 102.0000 | 1500.000 | 402.7171 | 121.4238       |
| Mixed stands 1600 | 11      | 281.9091 | 79.0000  | 1600.000 | 438.5630 | 132.2317       |
| Mixed stands 1700 | 11      | 265.5455 | 54.0000  | 1700.000 | 477.9833 | 144.1174       |

Table SJ.3. T-test for Independent Samples Note: Variables were treated as independent samples

| Group 1 vs. Group 2                  | Mean Group 1 | Mean Group 2 | t-value  | df | p        | t separ. var.est. | df       | p 2-sided | Std.Dev. Group 1 | Std.Dev. Group 2 |
|--------------------------------------|--------------|--------------|----------|----|----------|-------------------|----------|-----------|------------------|------------------|
| Pure stands 700 vs. Mixed stands 700 | 456.2000     | 183.0909     | 2.936006 | 14 | 0.010842 | 2.962196          | 7.98296  | 0.018128  | 169.7445         | 173.5410         |
| Pure stands 800 vs. Mixed stands 800 | 532.0000     | 199.8182     | 3.257885 | 14 | 0.005722 | 3.626205          | 10.23397 | 0.004471  | 153.2531         | 201.5881         |
| Pure stands 900 vs. Mixed stands 900 | 484.5714     | 215.6364     | 2.536506 | 16 | 0.021995 | 2.616486          | 14.21351 | 0.020119  | 201.0604         | 229.5353         |
| Pure stands 1000 vs.                 | 471.4444     | 223.0909     | 2.248116 | 18 | 0.037336 | 2.281132          | 17.90508 | 0.035004  | 226.4349         | 260.2301         |

|                                           |          |          |          |    |          |          |          |          |          |          |
|-------------------------------------------|----------|----------|----------|----|----------|----------|----------|----------|----------|----------|
| Mixed stands 1000                         |          |          |          |    |          |          |          |          |          |          |
| Pure stands 1100 vs.<br>Mixed stands 1100 | 518.0000 | 228.1818 | 2.231380 | 17 | 0.039409 | 2.270656 | 16.11402 | 0.037229 | 262.1156 | 291.0886 |
| Pure stands 1200 vs.<br>Mixed stands 1200 | 463.6364 | 235.4545 | 1.833235 | 20 | 0.081696 | 1.833235 | 19.15900 | 0.082353 | 259.5324 | 321.0328 |
| Pure stands 1300 vs.<br>Mixed stands 1300 | 439.4545 | 255.9091 | 1.334003 | 20 | 0.197196 | 1.334003 | 19.51847 | 0.197560 | 296.2541 | 347.0946 |
| Pure stands 1400 vs.<br>Mixed stands 1400 | 439.6364 | 283.1818 | 1.047377 | 20 | 0.307419 | 1.047377 | 19.68192 | 0.307618 | 327.2972 | 371.9225 |
| Pure stands 1500 vs.<br>Mixed stands 1500 | 441.6364 | 289.9091 | 0.933887 | 20 | 0.361501 | 0.933887 | 19.72938 | 0.361652 | 358.0157 | 402.7171 |
| Pure stands 1600 vs.<br>Mixed stands 1600 | 418.4545 | 281.9091 | 0.765409 | 20 | 0.452967 | 0.765409 | 19.80651 | 0.453053 | 397.1613 | 438.5630 |
| Pure stands 1700 vs.<br>Mixed stands 1700 | 392.8182 | 265.5455 | 0.651051 | 20 | 0.522425 | 0.651051 | 19.84983 | 0.522480 | 438.0687 | 477.9833 |

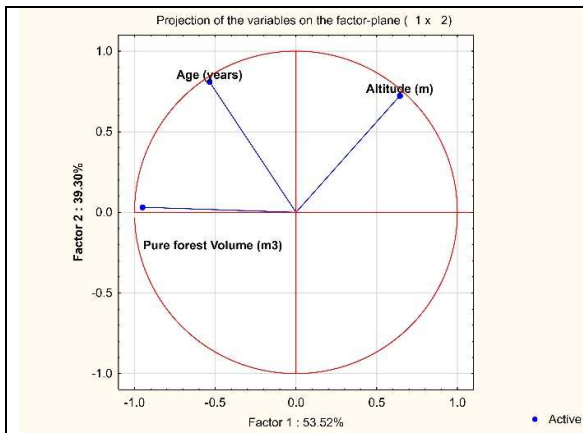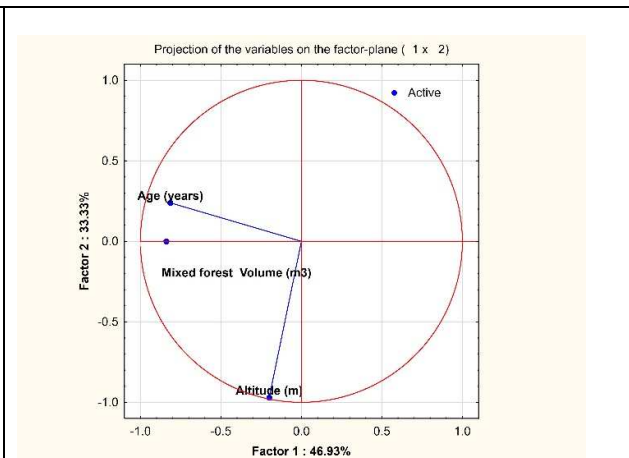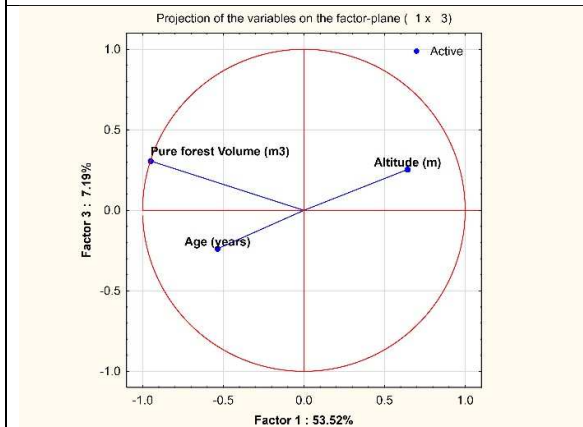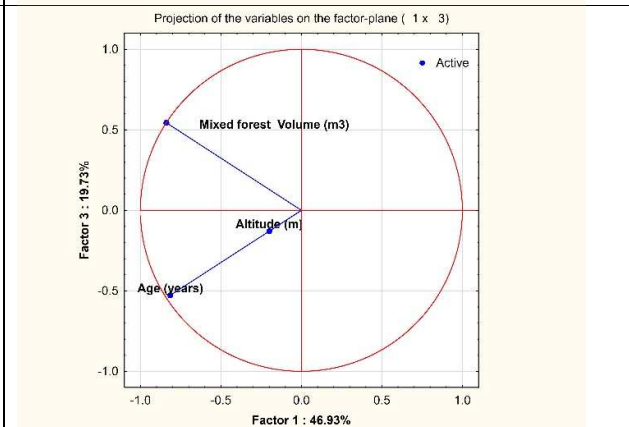

Fig. SJ.3 – PCA representation for Southern Carpathians Total Pure stands versus mixed stands

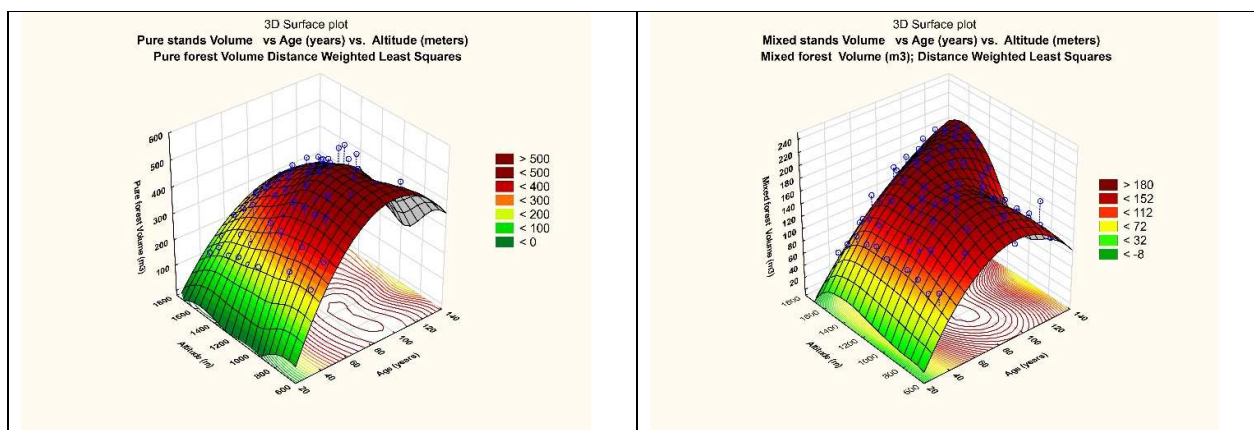

Fig. SJ.4 – Surface plot representation for Southern Carpathians Total Pure stands versus mixed stands
